# Supplementary material for: Isoreticular design of flexible Zn-based tetracarboxylate MOFs
Source: Royal Society of Chemistry journal article supplement (doi:10.1039/d3qi00480e), 2023-01-01
Supplement: d3qi00480e1.pdf [file d3qi00480e1.pdf]

## Supporting Information

### for the publication “Isorecticular design of flexible Zn-based tetracarboxylate MOFs”

Bodo Felsner<sup>\*a</sup>, Volodymyr Bon<sup>a</sup>, Christopher Bachetzky<sup>b</sup>, Eike Brunner<sup>b</sup>, Stefan Kaskel<sup>a</sup>

- a. Department for Inorganic Chemistry I, Technical University Dresden, Bergstraße 66, 01069 Dresden, Germany
- b. Department for Bioanalytical Chemistry, Technical University Dresden, Bergstraße 66, 01069 Dresden, Germany

#### 1. IR and NMR Spectra for Linker Characterization

1.1. Et<sub>4</sub>tpdatb

1.2. H<sub>4</sub>tpdatb

#### 2. Additional Figures for MOF Characterization

2.1. DUT-180

2.2. DUT-190

# 1. IR and NMR Spectra for Linker Characterization

## 1.1. Et<sub>4</sub>tpdatb

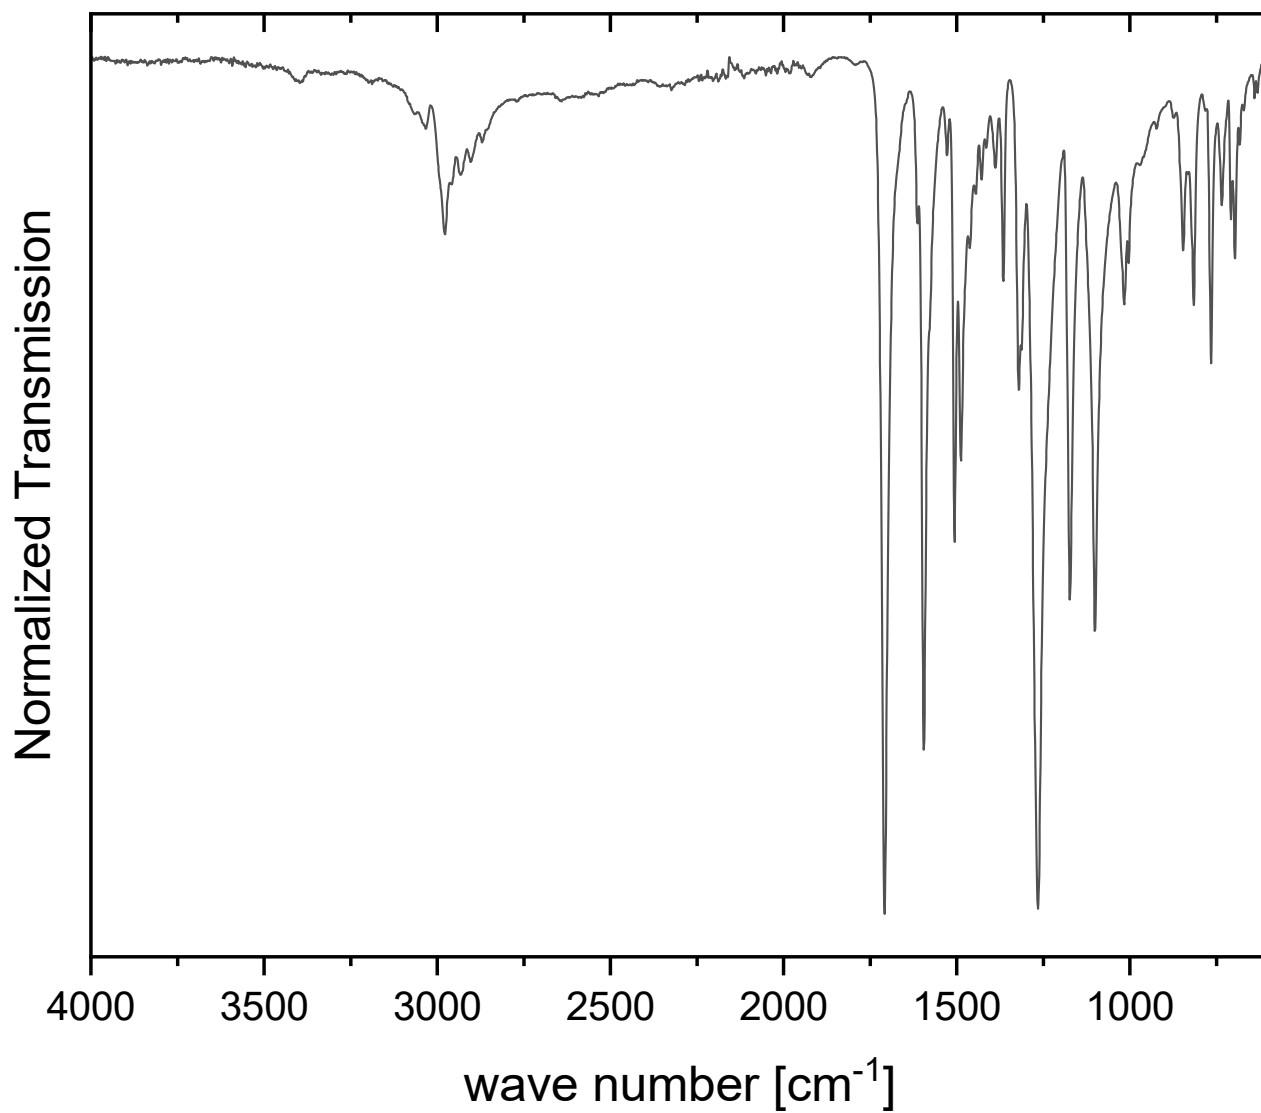

ESI Fig. S1: ATR-IR spectrum of Et<sub>4</sub>tpdatb.

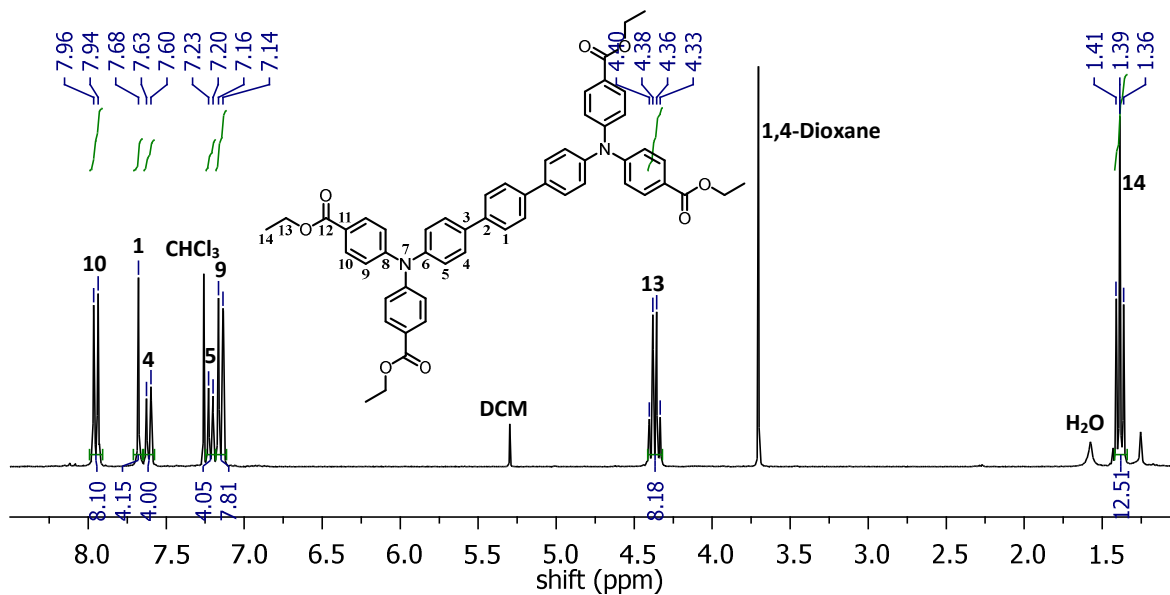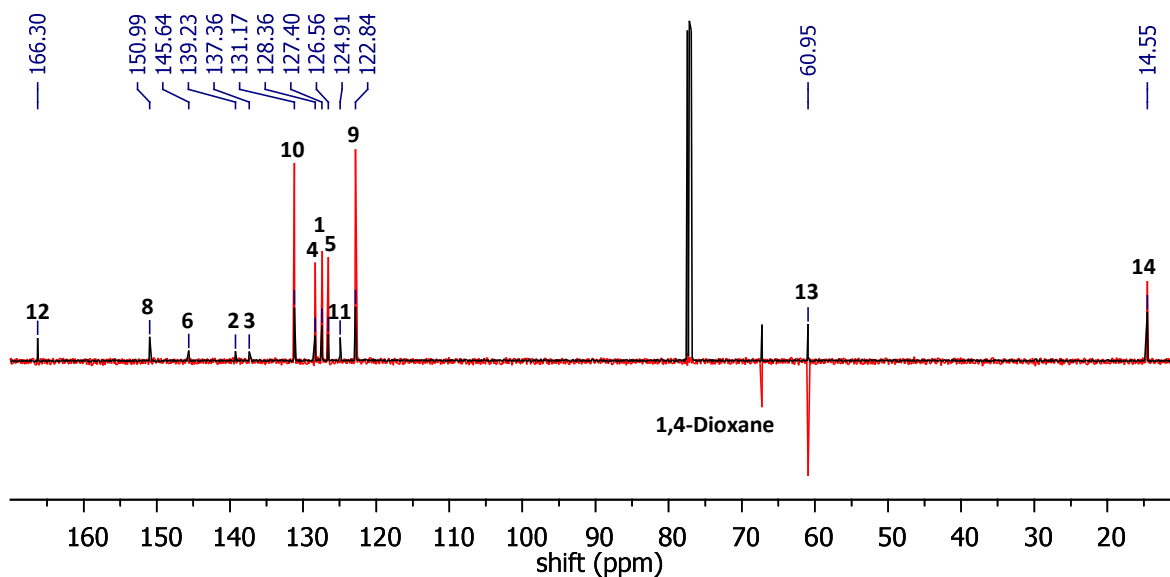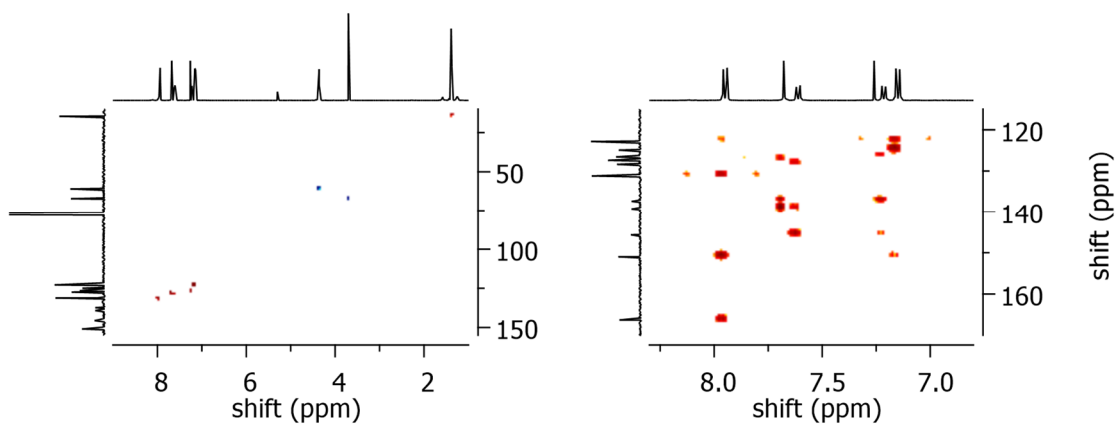

ESI Fig. S2: NMR spectra of Et<sub>4</sub>tpdatb in DMSO-d<sub>6</sub>. Top: section of the <sup>1</sup>H NMR (500 MHz), center: section of the <sup>13</sup>C NMR (126 MHz) (black) and dept-135 (red), bottom left: <sup>1</sup>H-<sup>13</sup>C-HSQC, bottom right: section of the <sup>1</sup>H-<sup>13</sup>C-HMBC.

## 1.2. H<sub>4</sub>tpdatb

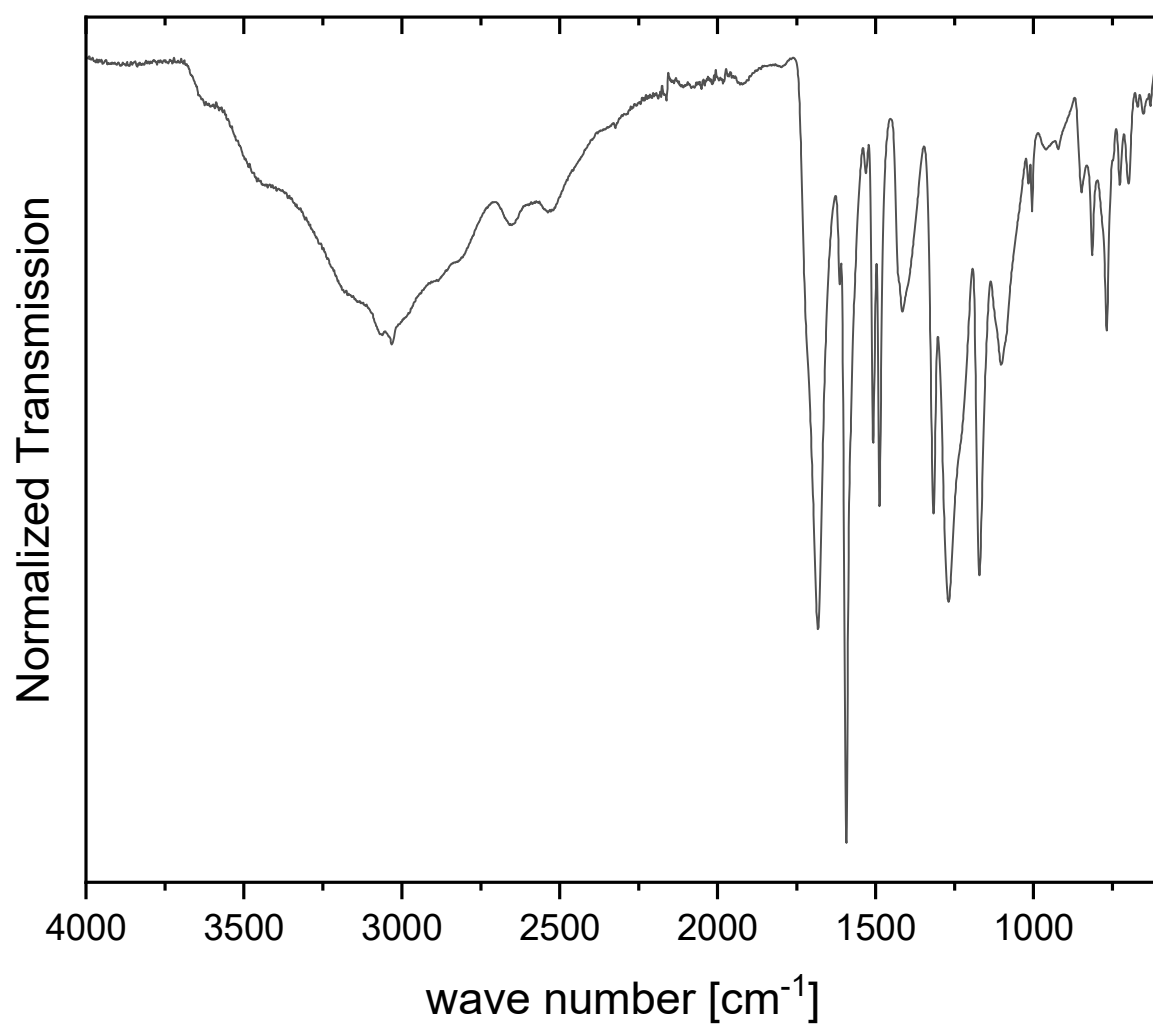

ESI Fig. S3: ATR-IR spectrum of the H<sub>4</sub>tpdatb linker.

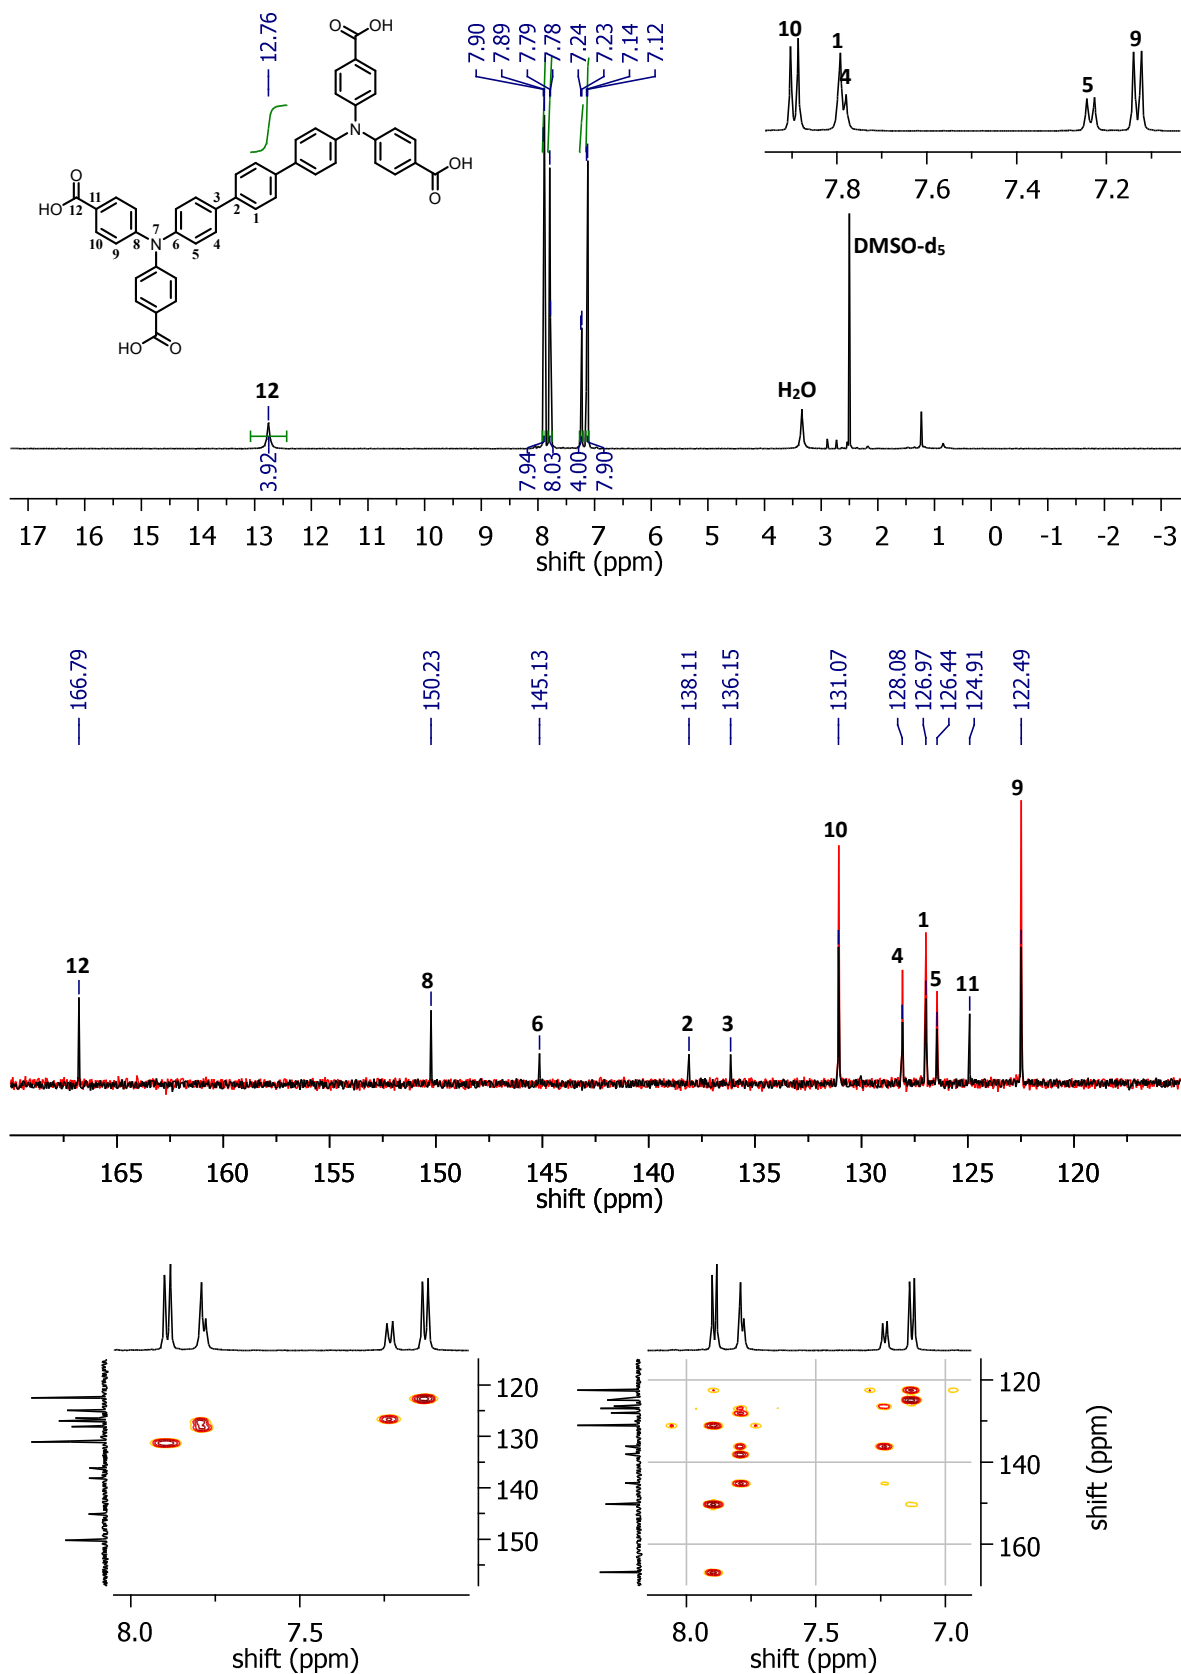

ESI Fig. S4: NMR spectra of  $H_4tpdatb$  in  $DMSO-d_6$ . Top:  $^1H$  NMR (500 MHz), center: section of the  $^{13}C$  NMR (126 MHz) (black) and dept-135 (red), bottom left: section of the  $^1H$ - $^{13}C$ -HSQC, bottom right: section of the  $^1H$ - $^{13}C$ -HMBC.

## 2. Additional Figures for MOF Characterization

### 2.1. DUT-180

ESI Table S1: Structure parameters of DUT-180op and DUT-180cp.

| Unit cell parameter       | DUT-180op              | DUT-180cp             |
|---------------------------|------------------------|-----------------------|
| $a$ (Å)                   | 23.363(14)             | 25.625(7) Å           |
| $b$ (Å)                   | 44.43(4) Å             | 46.937(6) Å           |
| $c$ (Å)                   | 17.167(10) Å           | 7.173(5) Å            |
| $\alpha = \beta = \gamma$ | 90 °                   | 90 °                  |
| $V$ (Å <sup>3</sup> )     | 17819.7 Å <sup>3</sup> | 8627.8 Å <sup>3</sup> |

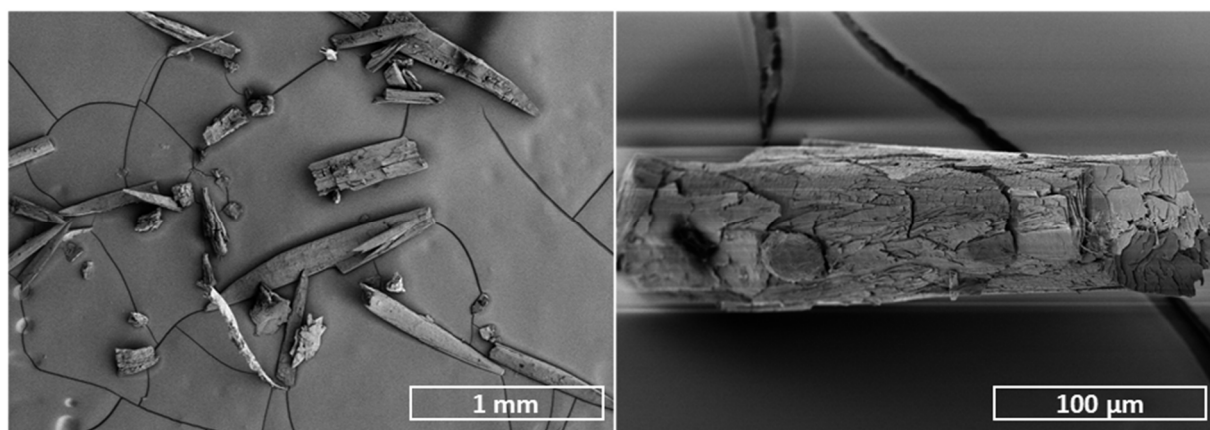

ESI Fig. S5: SEM images of activated DUT-180.

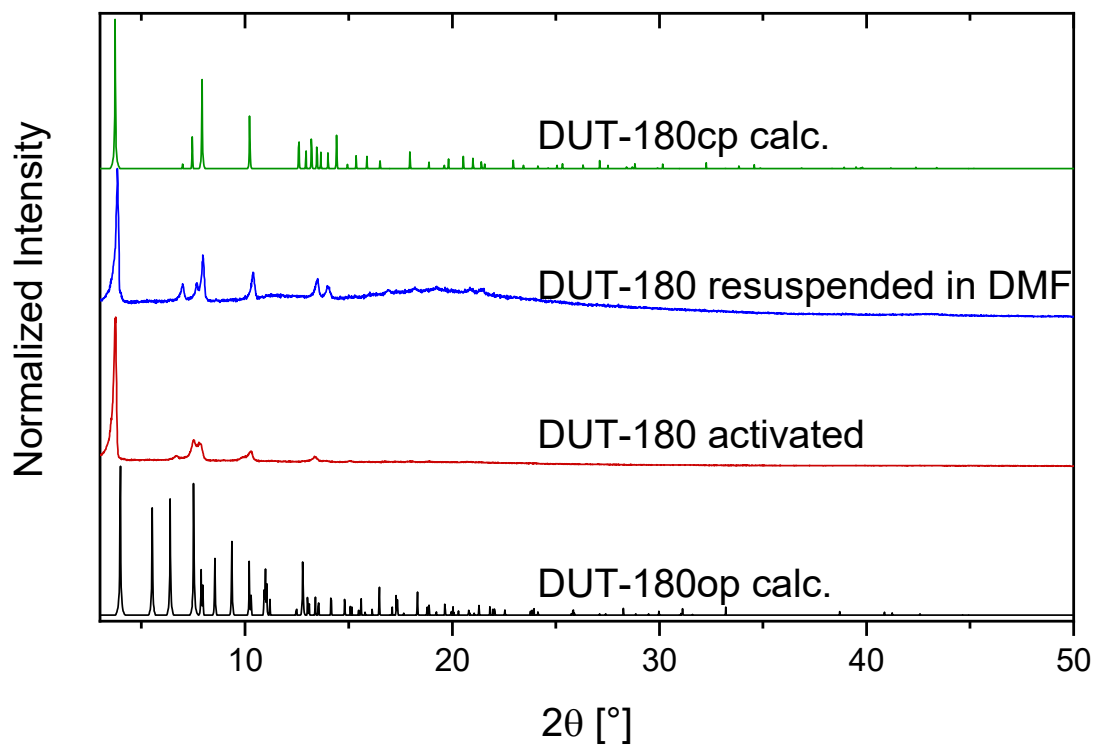

ESI Fig. S6: PXRD of DUT-180 activated and DUT-180 resuspended in DMF in comparison to theoretical PXRD patterns of DUT-180op and DUT-180cp.

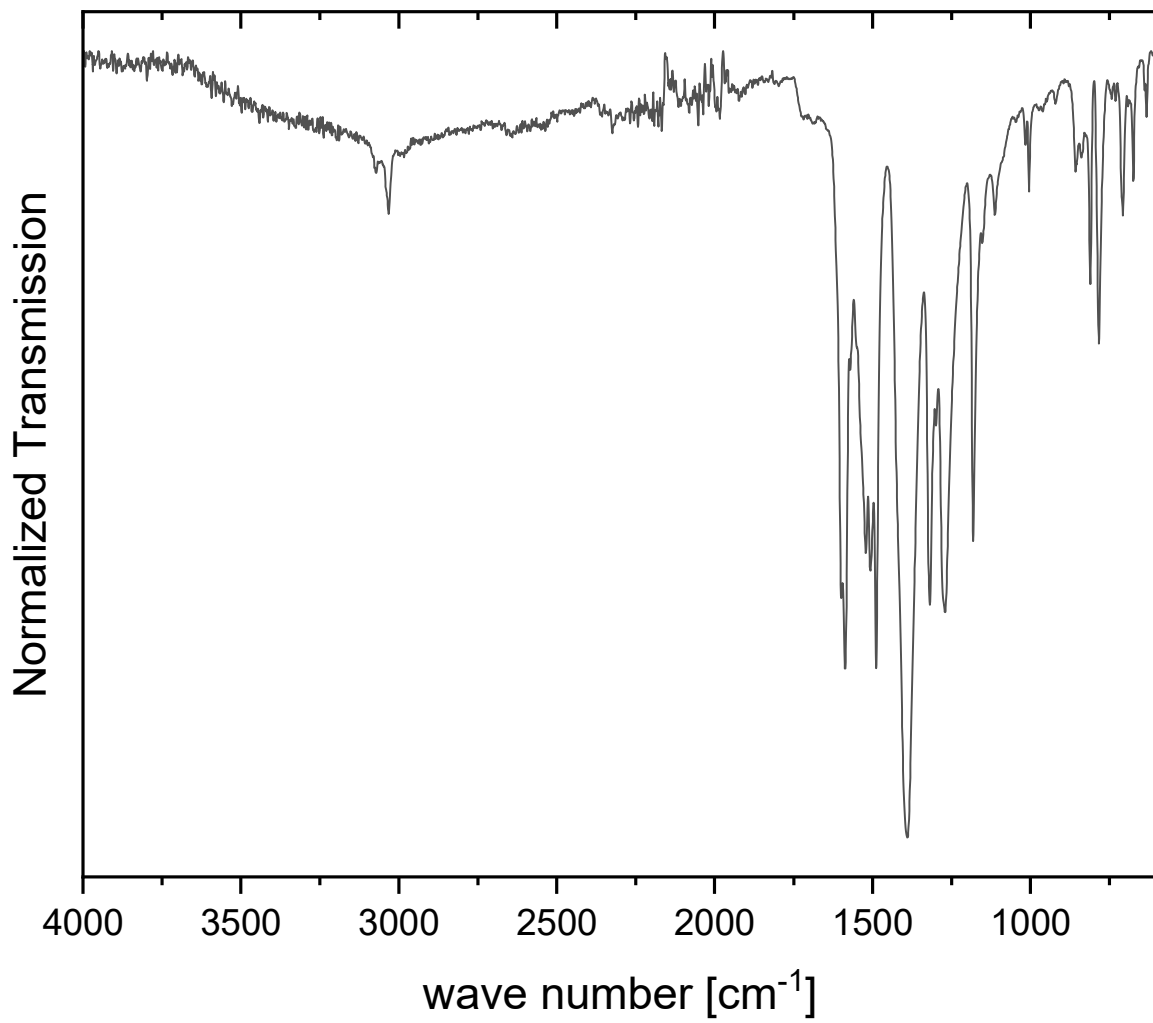

ESI Fig. S7: ATR-IR spectrum of activated DUT-180 stored under Argon atmosphere.



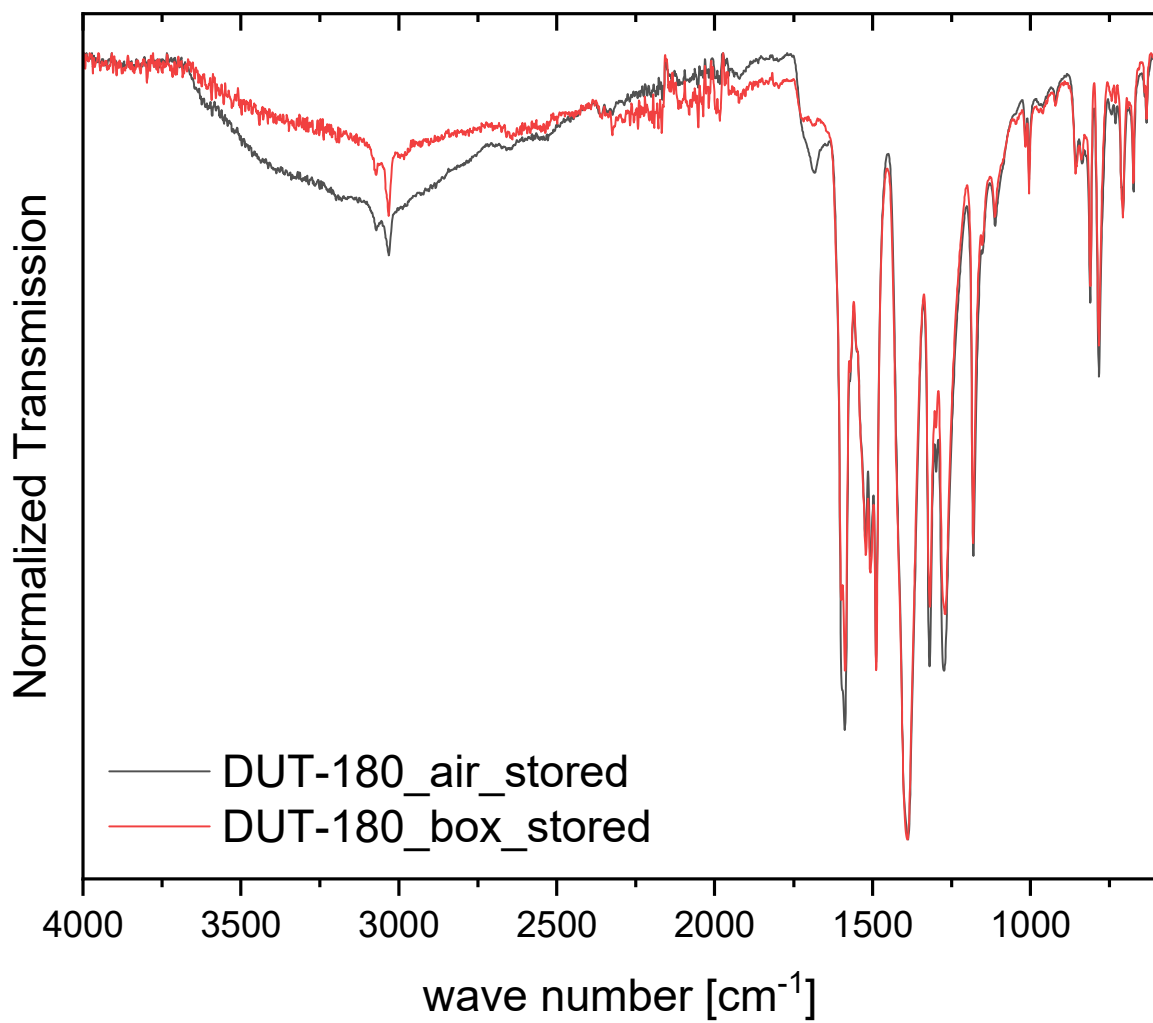

ESI Fig. S8: Comparison of ATR-IR spectra of activated DUT-180 stored under Argon in the glove box and DUT-180 stored under air for several weeks.

## 2.2. DUT-190

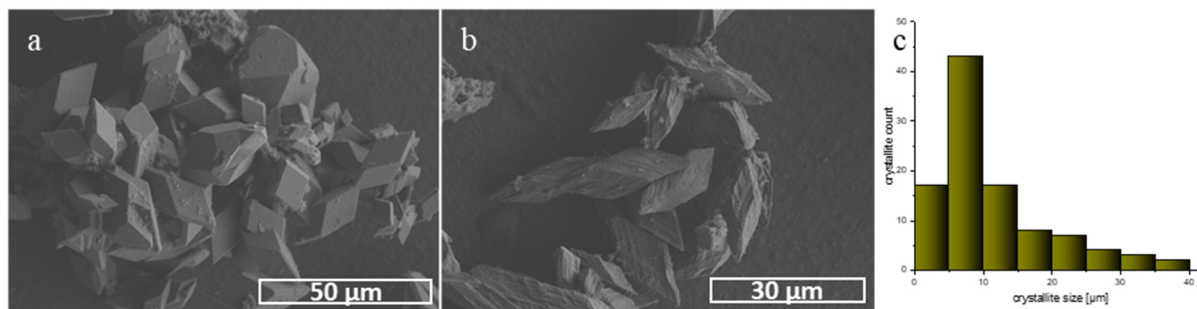

ESI Fig. S9: SEM before (a) and after (b) nitrogen physisorption as well as crystallite size distribution (c) before adsorption. The crystallite sizes refers to the edge lengths of the occurring crystals on several taken images.

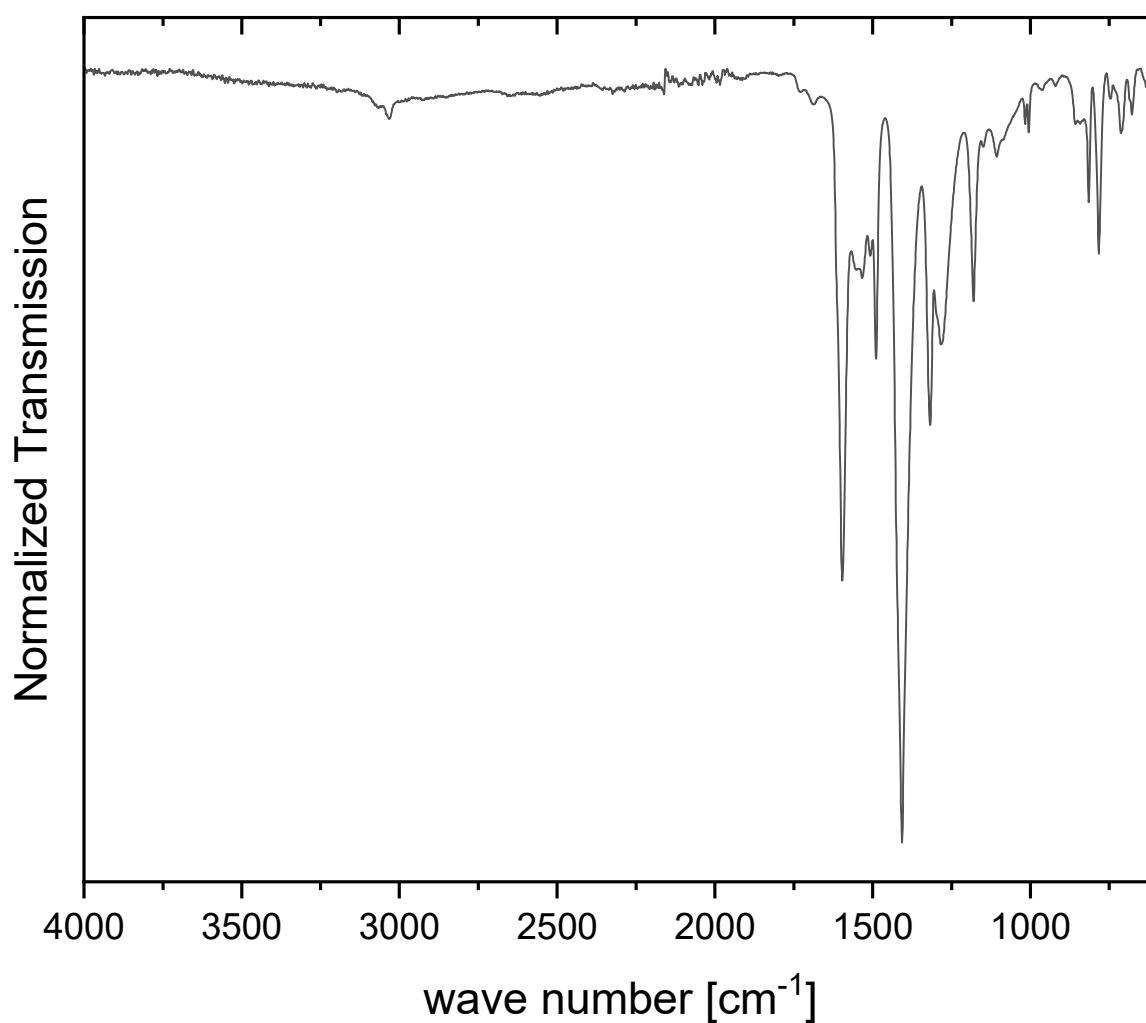

ESI Fig. S10: ATR-IR spectrum of activated DUT-190 stored under Argon atmosphere.

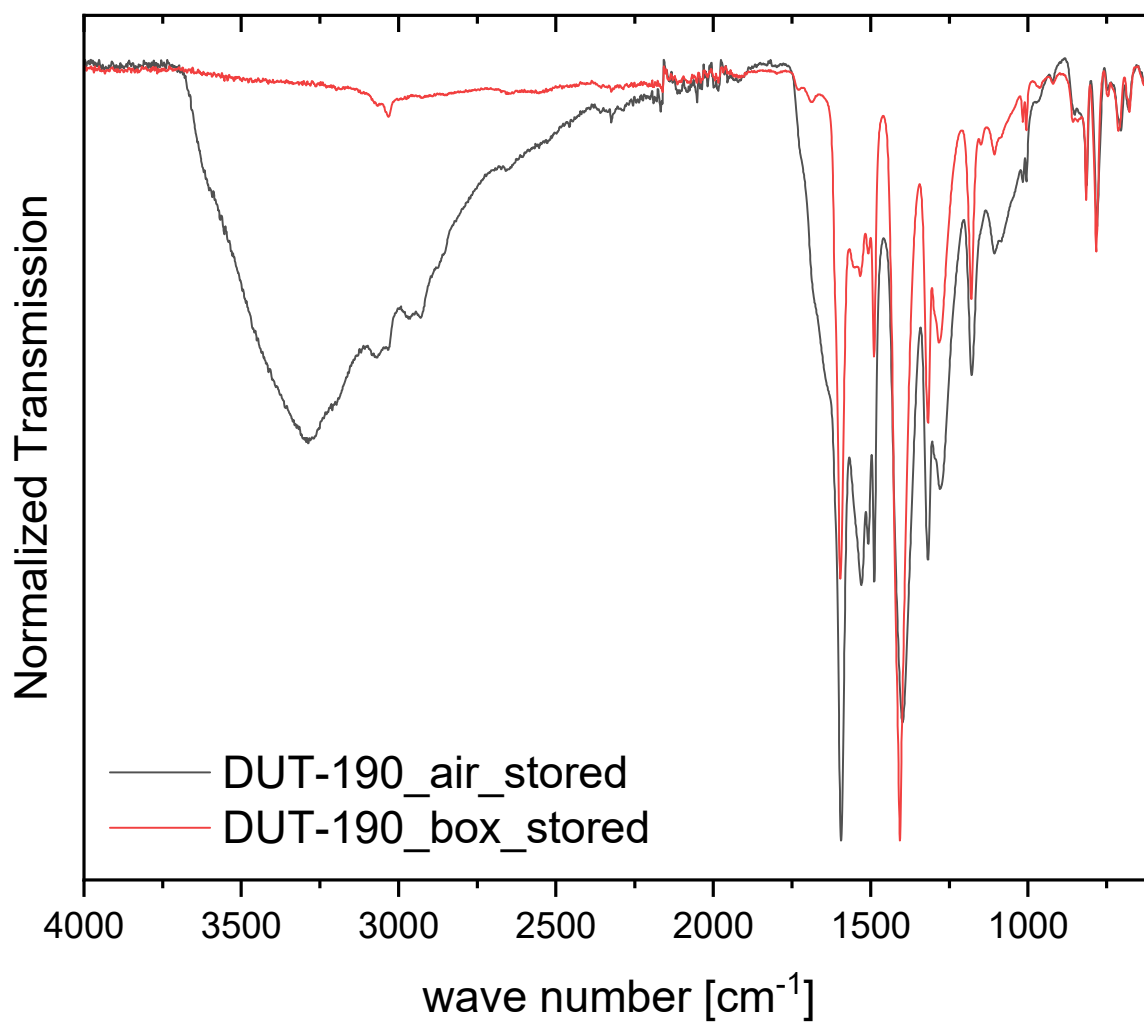

ESI Fig. S11: Comparison of ATR-IR spectra of activated DUT-190 stored under Argon in the glove box and DUT-190 stored under air for several weeks.

## N<sub>2</sub> Physisorption

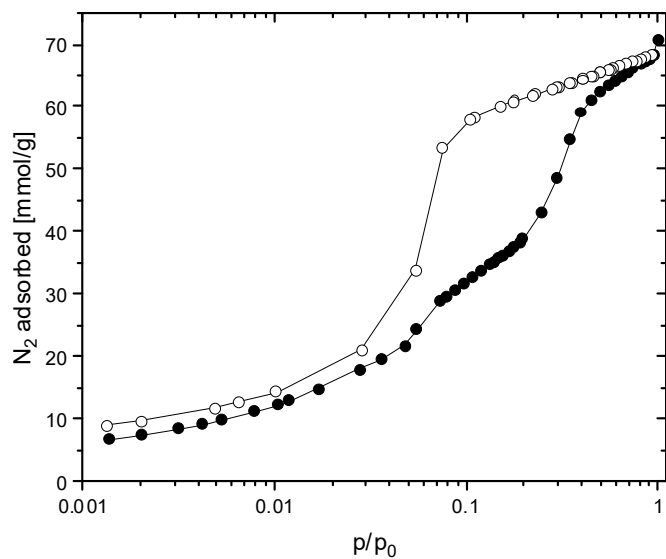

ESI Fig. S12: Semilogarithmic plot of Nitrogen physisorption isotherm at 77 K of the DUT-190 batch shown in Fehler! Verweisquelle konnte nicht gefunden werden.c, synthesized and activated by supercritical CO<sub>2</sub>.

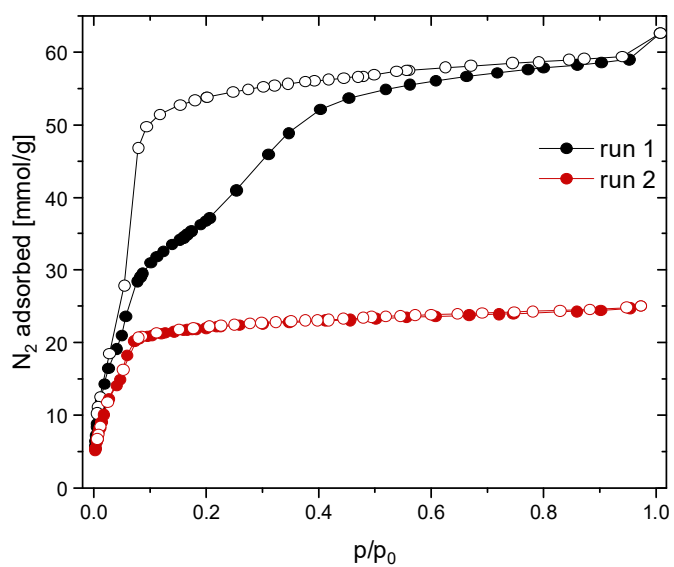

ESI Fig. S13: Isotherms of two runs of nitrogen physisorption at 77 K on DUT-190 without further activation between runs.

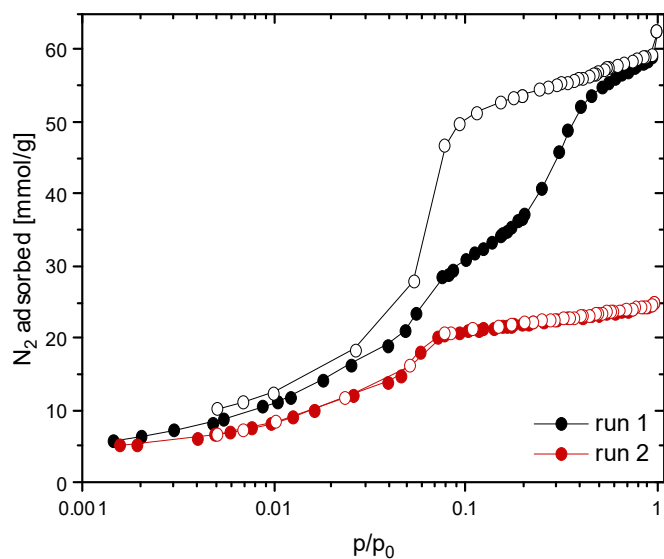

ESI Fig. S14: Semilogarithmic plot of Nitrogen physisorption isotherms at 77 K for the DUT-190 batch demonstrated in the previous figure.

## CH<sub>4</sub> Physisorption

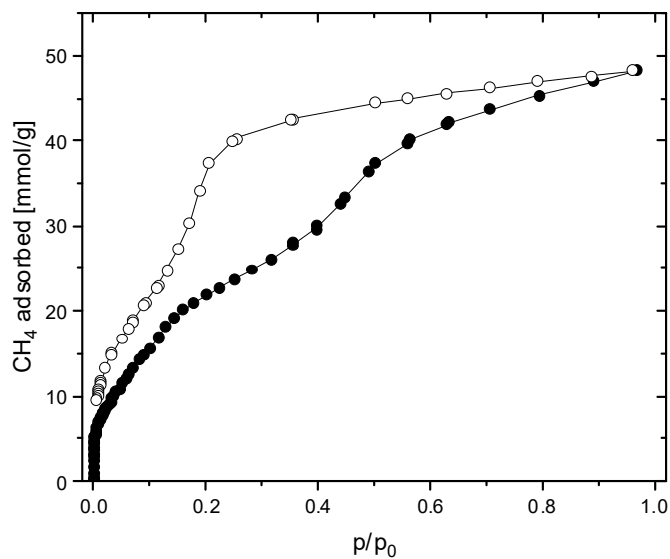

ESI Fig. S15: DUT-190 methane physisorption isotherm at 111 K, activated by supercritical CO<sub>2</sub>.

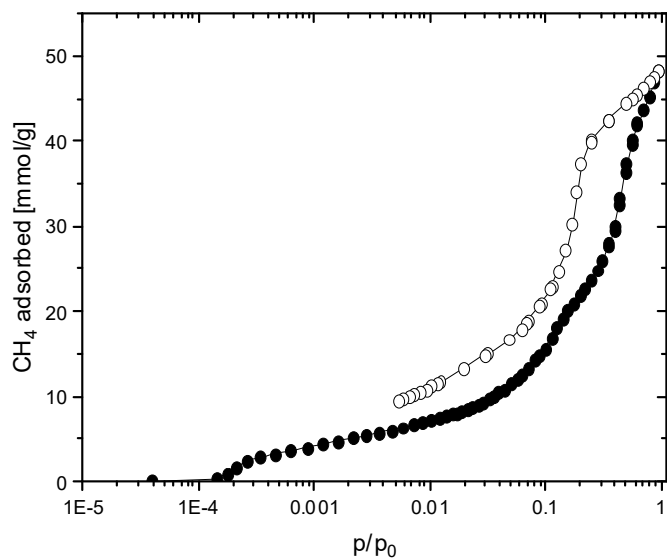

ESI Fig. S16: Semilogarithmic plot of DUT-190 methane physisorption isotherm at 111 K, activated by supercritical CO<sub>2</sub>.

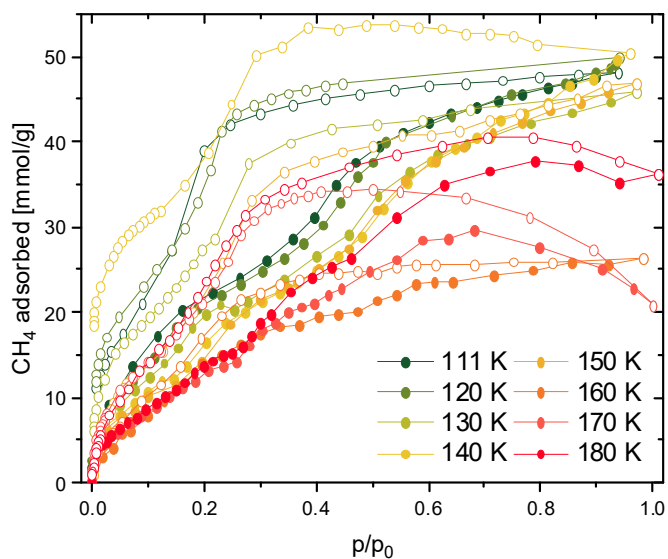

ESI Fig. S17: Methane Excess Adsorption of DUT-190 at various temperatures from 111 K up to 180 K using a new sample for each measurement.

### CO<sub>2</sub> Physisorption

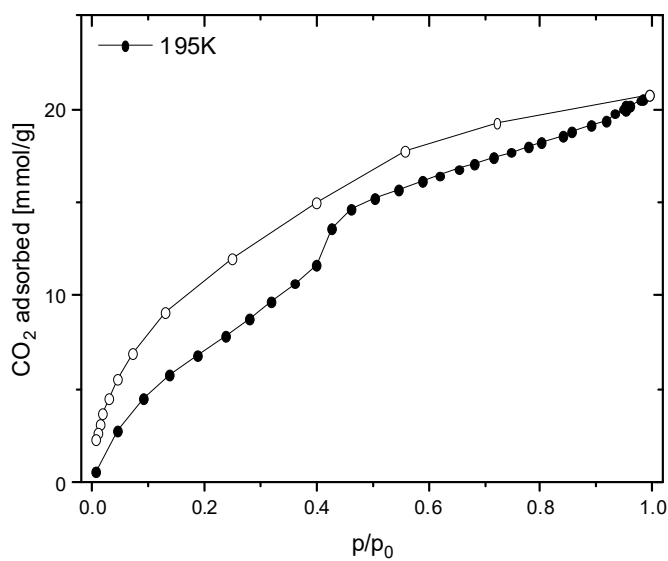

ESI Fig. S18: CO<sub>2</sub> Adsorption of DUT-190 at 195 K.

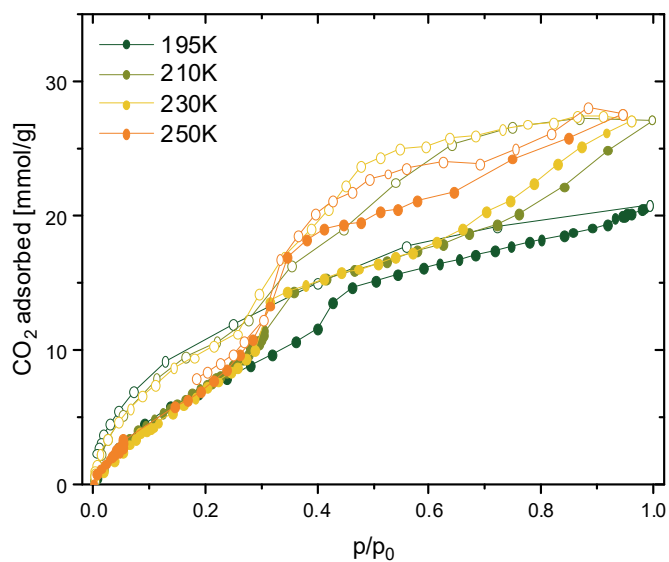

ESI Fig. S19: CO<sub>2</sub> Excess Adsorption of DUT-190 at various temperatures from 195 K up to 250 K using a new sample for each measurement.

### Xe Physisorption

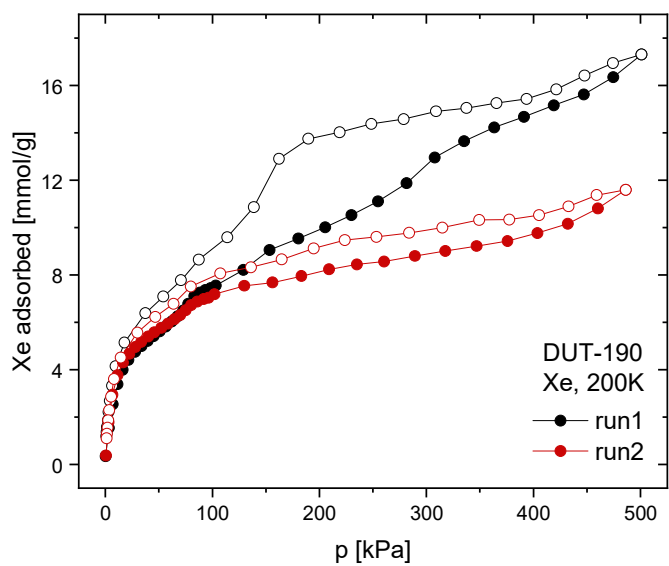

ESI Fig. S20: Two runs of Xe Excess Adsorption of DUT-190 at 200 K.



## Crystal structures of contracted phases

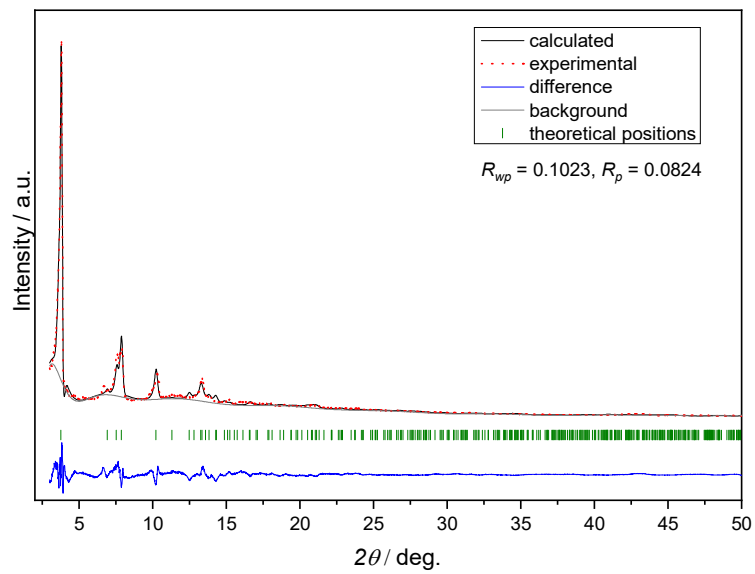

ESI Fig. S21: Rietveld plot for DUT-180cp.

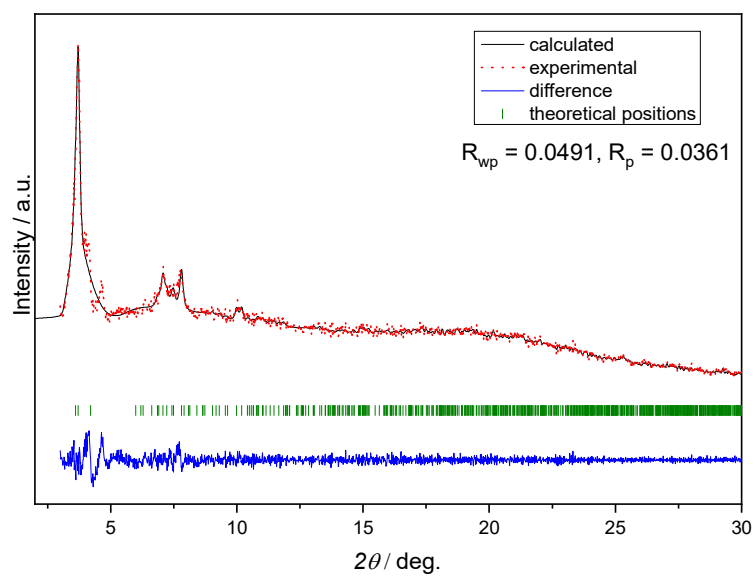

ESI Fig. S22: Pawley plot for DUT-190cp.

### In situ PXRD in parallel to CO<sub>2</sub> physisorption at 195 K.

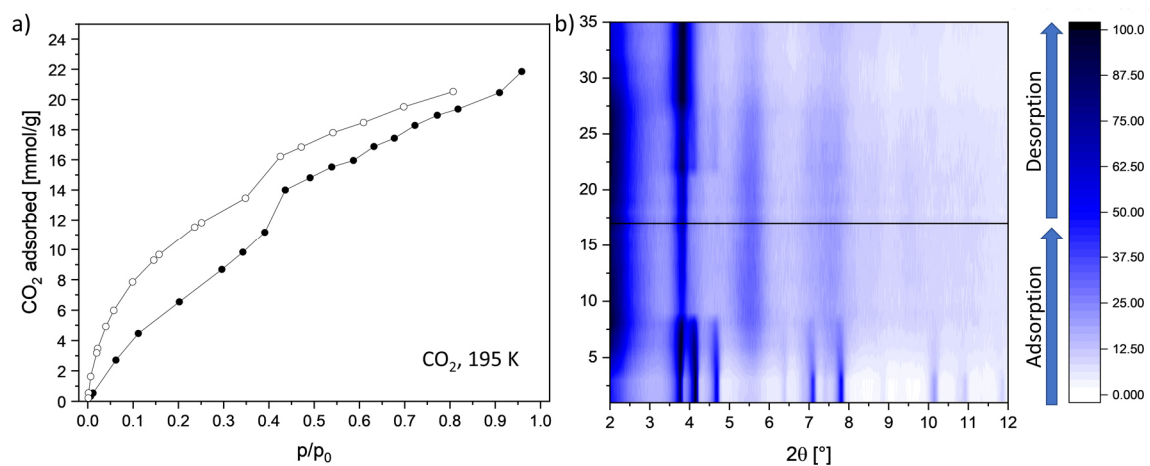

ESI Fig. S23: Physorption isotherm of CO<sub>2</sub> at 195 K on DUT-190 (a) and PXRD patterns, measured in parallel to adsorption and desorption (b).

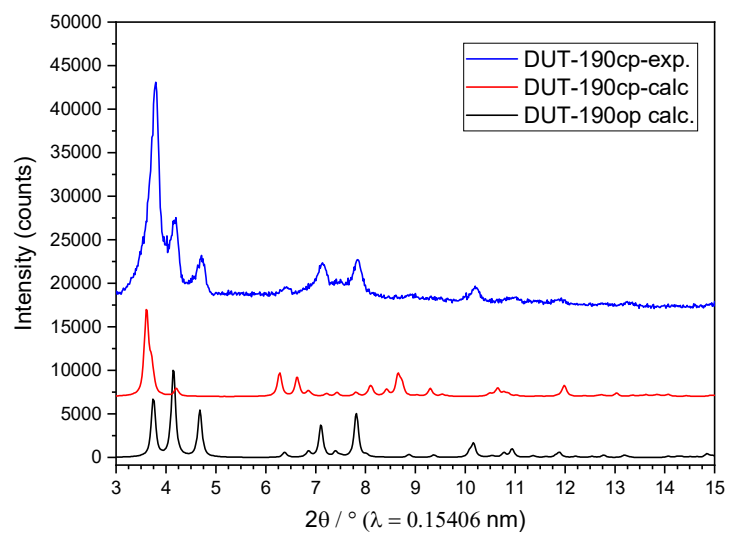

ESI Fig. S24: Calculated and experimental PXRD patterns of DUT-190op and DUT-190cp phases.

## Geometrical pore size distribution

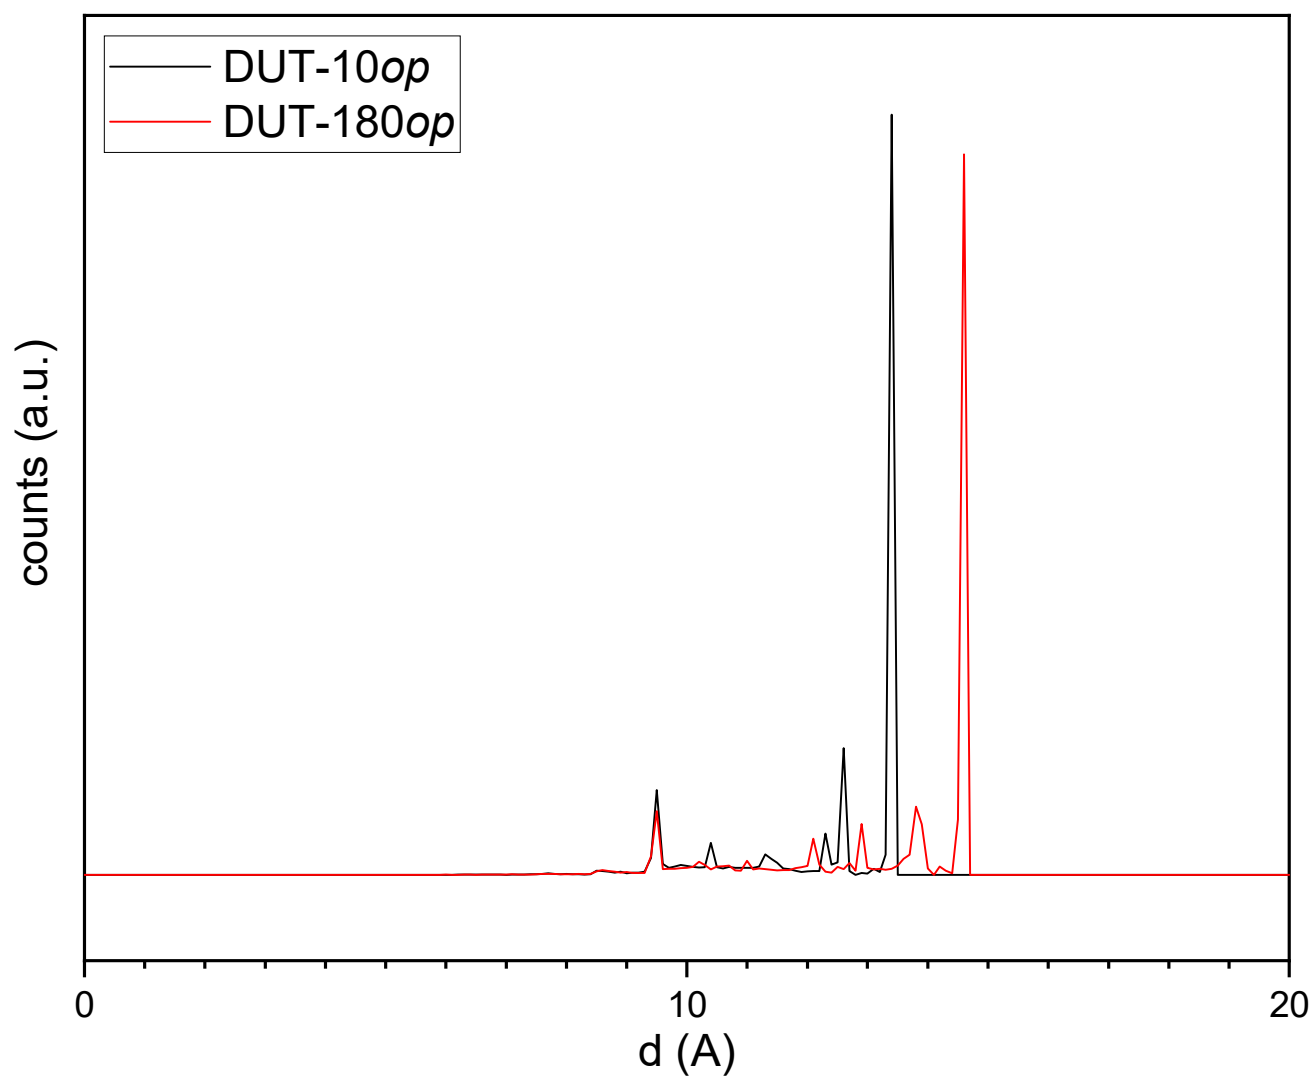

ESI Fig. S25: Pore size distribution of DUT-10op and DUT-180op in comparison.

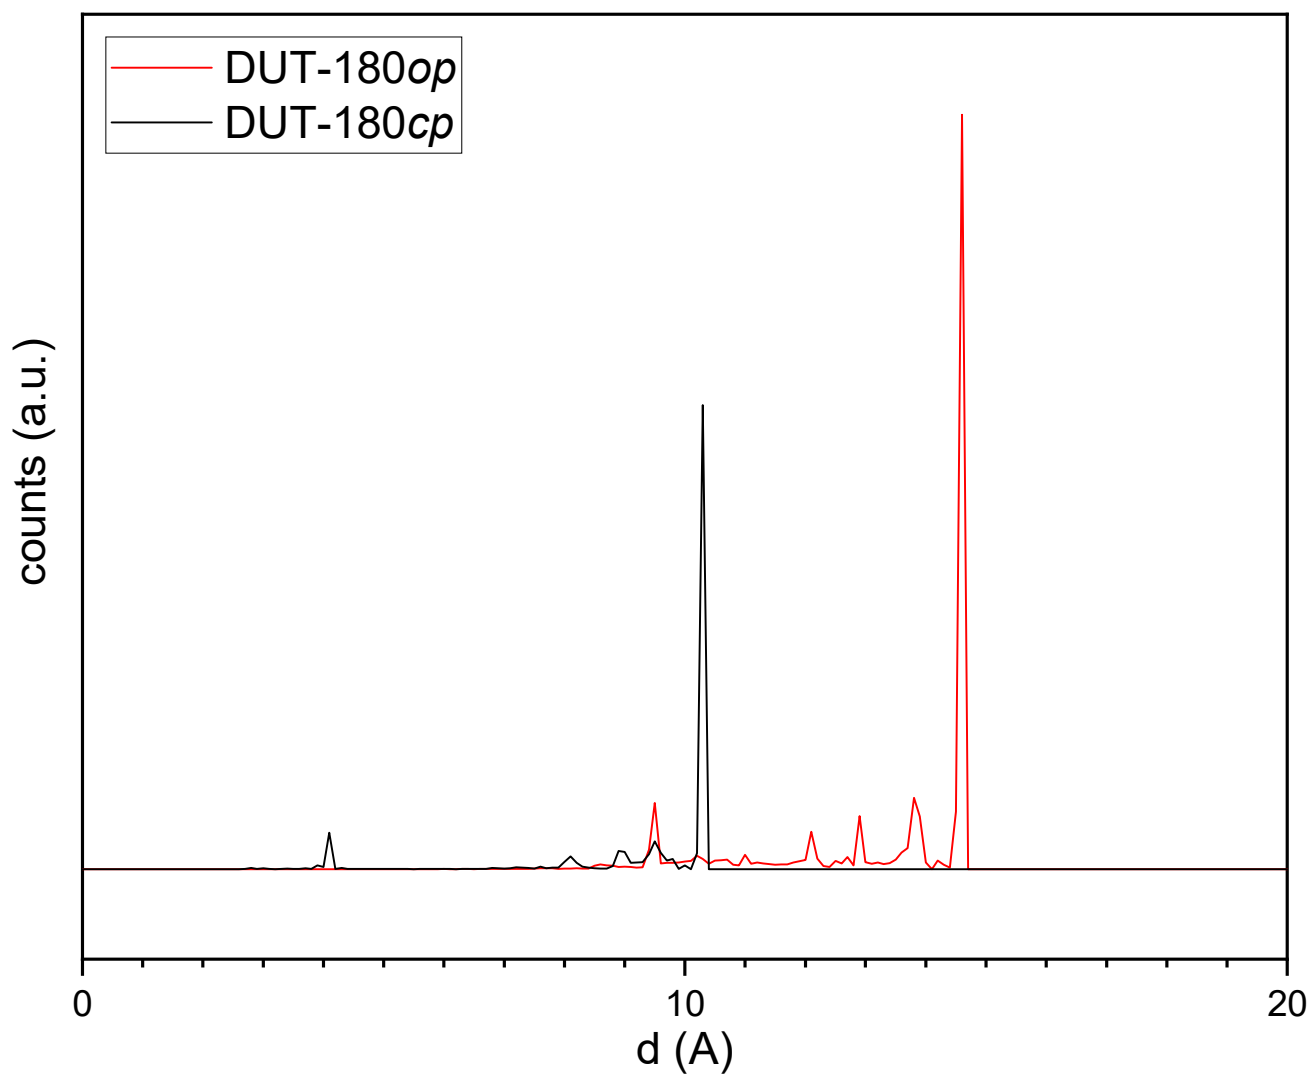

ESI Fig. S26: Pore size distribution of DUT-180<sub>op</sub> and DUT-180<sub>cp</sub> in comparison.

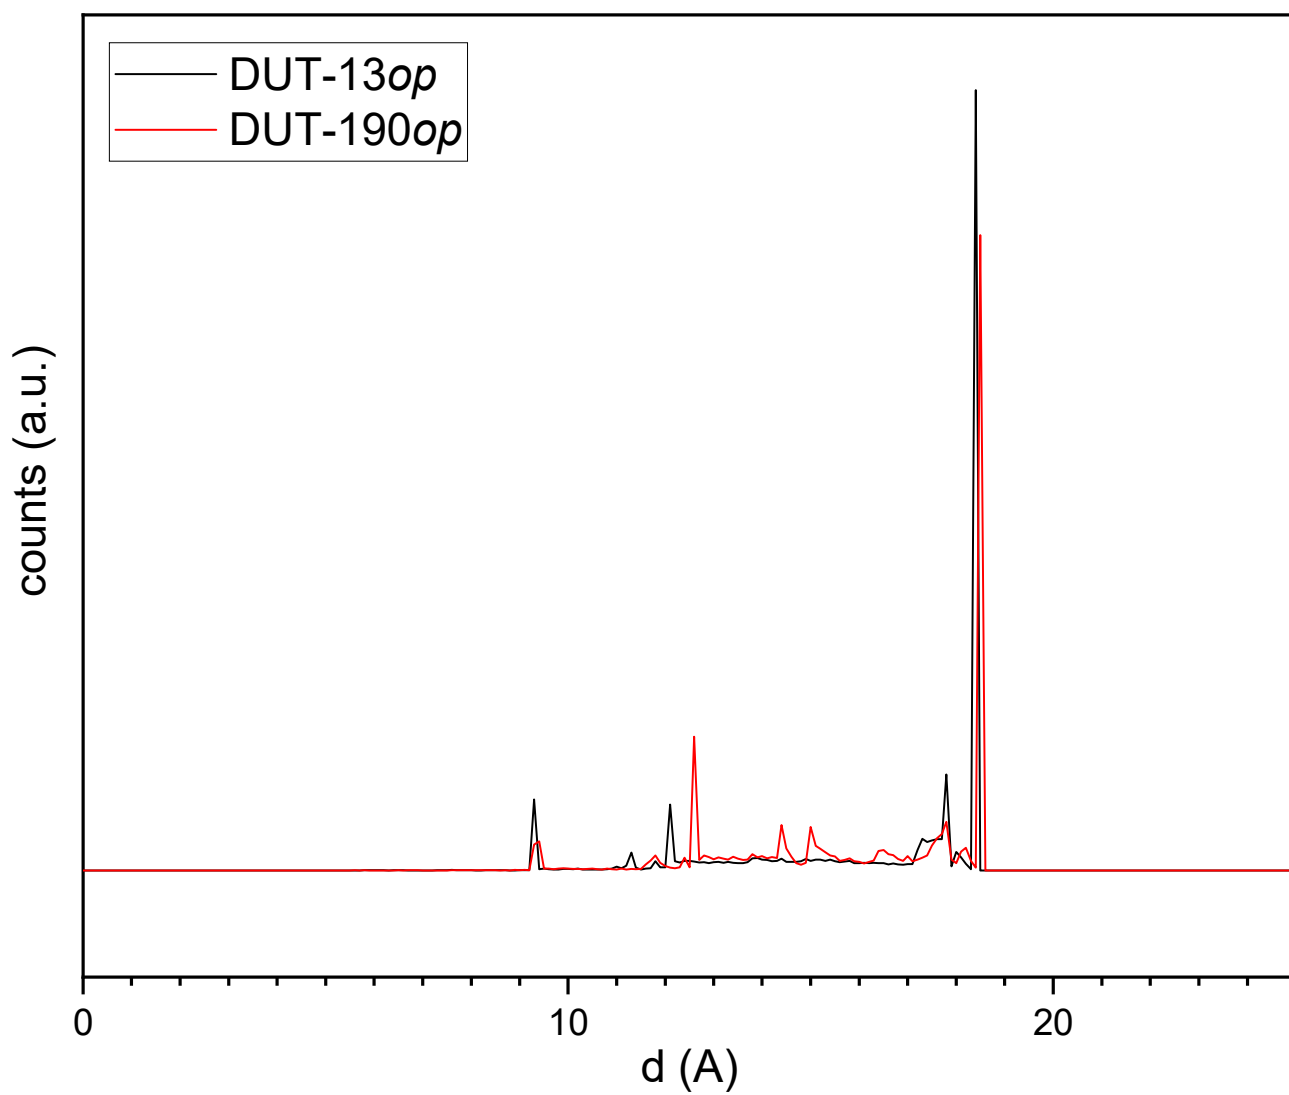

ESI Fig. S27: Pore size distribution of DUT-13op and DUT-190op in comparison.
